# Supplementary material for: Continuing Education in Digital Skills for Healthcare Professionals — Mapping of the Current Situation in EU Member States
Source: PubMed Central journal article supplement (PMC11365066; doi:10.34172/ijhpm.8309), 2024-06-24
Supplement: ijhpm-13-8309-s002.pdf [file ijhpm-13-8309-s002.pdf]

**Article title:** Continuing Education in Digital Skills for Healthcare Professionals — Mapping of the Current Situation in EU Member States

**Journal name:** International Journal of Health Policy and Management (IJHPM)

**Authors' information:** Anu-Marja Kaihlanen<sup>1¶\*</sup>, Lotta Virtanen<sup>1¶</sup>, Emma Kainiemi<sup>1</sup>, Virpi Sulosaari<sup>2</sup>, Tarja Heponiemi<sup>1</sup>

<sup>1</sup>Department of Public Health and Welfare, Finnish Institute for Health and Welfare, Helsinki, Finland.

<sup>2</sup>Faculty of Health and Well-being, Turku University of Applied Sciences, Master School, Turku, Finland

**\*Correspondence to:** Anu-Marja Kaihlanen; Email: [anu.kaihlanen@thl.fi](mailto:anu.kaihlanen@thl.fi)

¶ Both authors contributed equally to this paper.

**Citation:** Kaihlanen AM, Virtanen L, Kainiemi E, Sulosaari V, Heponiemi T. Continuing education in digital skills for healthcare professionals — mapping of the current situation in EU Member States. *Int J Health Policy Manag.* 2024;13:8309. doi:[10.34172/ijhpm.8309](https://doi.org/10.34172/ijhpm.8309)

**Supplementary file 2.** Used Online Sources by Country

## **Austria**

Ammenwerth, E., & Hackl, W. O. (2019). Topics for Continuous Education in Nursing

Informatics: Results of a Survey Among 280 Austrian Nurses. *Studies in health technology and informatics*, 260, 162–169. <https://doi.org/10.3233/978-1-61499-971-3-162>

Digital Austria. (2023). Digitale Kompetenzoffensive für Österreich.

<https://www.digitalaustria.gv.at/Strategien/DKO-Digitale-Kompetenzoffensive.html>

Egbert, N., Thye, J., Hackl, W. O., Müller-Staub, M., Ammenwerth, E., & Hübner, U. (2019).

Competencies for nursing in a digital world. Methodology, results, and use of the DACH-recommendations for nursing informatics core competency areas in Austria, Germany, and

Switzerland. *Informatics for health & social care*, 44(4), 351–375.

<https://doi.org/10.1080/17538157.2018.1497635>

Hassler, M. (2022). Digitalization and new technologies in care – concepts and potentials for nursing care provision. In: Primic, N (Ed.). *Digitalisierung der Pflege. Interdisziplinäre Perspektiven auf digitale Transformation in der pflegerischen Praxis*. V&R unipress.

Medizinische Universität Graz. (2023). *Erweiterungsstudium digitalisierung in der medizin*.

<https://www.medunigraz.at/erweiterungsstudien/digitalisierung-in-der-medizin>

Rieder, A. (2020). Ausbildung zukünftiger Ärztinnen und Ärzte im Zusammenhang mit der digitalen Transformation und Covid-19 als Herausforderer im Medizinstudium. In F. Wallner & P. Niedermoser (Eds.), *Schwerpunktthema Telemedizin – Corona als Wendepunkt* (pp. 61–78). Ausgabe 2/2020. LIG – Linzer Institut für Gesundheitssystem-Forschung.

[https://www.telemedaustria.at/images/uploads/2020\\_Telemedizin\\_oe.pdf](https://www.telemedaustria.at/images/uploads/2020_Telemedizin_oe.pdf)

Telemed Austria. (2022). *Telemed Austria joins the ISfTeH*.

<https://www.telemedaustria.at/news/97-telemed-austria-joins-the-isfteh>

Vielgesundheit. (n.d.). *FAQ - Häufige Fragen und Hilfe*.

<https://www.vielgesundheit.at/fortbildungen/faq>

Österreichischen Ärztekammer. (2020). *Verordnung über ärztliche fortbildung*.

<https://www.arztakademie.at/diplom-fortbildungs-programm/grundsatzliches-begriffe/verordnung-ueber-aerztliche-fortbildung/>

## **Croatia**

Ministry of Science and Education. (2017). *New Colours of Knowledge. Strategy for education, science and technology*. [http://www.kvalifikacije.hr/sites/default/files/documents-publications/2018-03/SOZT\\_engleski.pdf](http://www.kvalifikacije.hr/sites/default/files/documents-publications/2018-03/SOZT_engleski.pdf)

## **Denmark**

Copenhagen Academy for Medical Education and Simulation. (n.d). Simulation courses and training sessions education. <https://comes.dk/en/uddannelse-og-traening/#digital|1||kursusoversigt|0>

## **Germany**

Macher, J. (2023). Neue Weiterbildung für digitale Pflege- und Gesundheitsversorgung: Kostenfreie Teilnahme an Modellprojekt möglich. Informationsdienst Wissenschaft. <https://idw-online.de/de/news808656>

## **Hungary**

European Union. (n.d). Digital skills & jobs platform. Hungarian Ministry of Human Resources. <https://digital-skills-jobs.europa.eu/en/organisations/hungarian-ministry-human-resources>

Magyar Egészségügyi Szakdolgozói Kamara – MESZK. (2023). Jelenlegi MESZK E-Továbbképzések. <https://meszk.hu/cikk/2023/06/08/jelenlegi-meszk-e-tovabbkepzesek>

Magyar Orvosi Kamara – MOK. (2023). A Magyar Orvosi Kamara Missziós Nyilatkozata. <https://mok.hu/a-kamararol/kuldetesunk-alapelveink>

## **Italy**

Casà, C., Marotta, C., Di Pumpo, M., Cozzolino, A., D'Aviero, A., Frisicale, E. M., Silenzi, A., Gabbrielli, F., Bertinato, L., & Brusaferrò, S. (2021). COVID-19 and digital competencies among young physicians: are we (really) ready for the new era? A national survey of the Italian Young Medical Doctors Association. *Annali dell'Istituto superiore di sanita*, 57(1), 1–6. [https://doi.org/10.4415/ANN\\_21\\_01\\_01](https://doi.org/10.4415/ANN_21_01_01)

Marceglia, S., Balestra, G., Bottrighi, A., Giacomini, M., Veltri, P., & Sacchi, L. (2022).

Developing the Digital Healthcare Workforce in Italy: The SIBIM Experience. *Studies in health technology and informatics*, 298, 46–50. <https://doi.org/10.3233/SHTI220905>

### **Netherlands**

Löffler, Christin, Altiner, Attila, Blumenthal, Sandra, Bruno, Pascale, De Sutter, An, De Vos,

Bart J., Dinant, Geert-Jan, Duerden, Martin, Dunais, Brigitte, Egidi, Günther, Gibis,

Bernhard, Melbye, Hasse, Rouquier, Frederic, Rosemann, Thomas, Touboul-Lundgren, Pia,

& Feldmeier, Gregor. (2022). Challenges and opportunities for general practice specific CME

in Europe – a narrative review of seven countries. *BMC Medical Education*, 22(1), 761.

<https://doi.org/10.1186/s12909-022-03832-7>

### **Poland**

Bartosiewicz, A., Burzyńska, J., & Januszewicz, P. (2021). Polish Nurses' Attitude to e-Health

Solutions and Self-Assessment of Their IT Competence. *Journal of Clinical Medicine*, 10,

4799. <https://doi.org/10.3390/jcm10204799>

Burzyńska, J., Bartosiewicz, A., & Januszewicz, P. (2023). Dr. Google: Physicians-The Web-

Patients Triangle: Digital Skills and Attitudes towards e-Health Solutions among Physicians

in South Eastern Poland-A Cross-Sectional Study in a Pre-COVID-19 Era. *International*

*journal of environmental research and public health*, 20(2), 978.

<https://doi.org/10.3390/ijerph20020978>

Dębska, G., Gorzkowicz, B., Foryś, Z., & Kilańska, D. (2020). Continuous professional

development of nurses and ICNP® introduction in Poland. *International journal of*

*occupational medicine and environmental health*, 33(3), 353–363.

<https://doi.org/10.13075/ijomeh.1896.01480>

Jākobsone, M. (2021). Poland - Digital Competence Development Programme (2020-2030).

<https://digital-skills-jobs.europa.eu/en/actions/national-initiatives/national-strategies/poland-digital-competence-development-programme>

Ministerstwo Cyfryzacji. (2023). Kompetencje cyfrowe.

<https://www.gov.pl/web/cyfryzacja/kompetencje-cyfrowe>

Staelraeve, S. (2023). Poland is an emerging market for telehealth in Europe.

<https://www.dashplus.be/business-advice/poland-is-an-emerging-market-for-telehealth-in-europe/>

## **Portugal**

National School of Public Health, Nova University Lisbon. (n.d). Postgraduate courses: Digital

Health Executive Course. <https://www.ensp.unl.pt/courses/postgraduate-courses/digital-health-executive-course/>

ReferNet Portugal, Cedefop. (2023). Strengthening digital skills for competitiveness and

inclusion. National news on VET. <https://www.cedefop.europa.eu/fr/news/portugal-strengthening-digital-skills-competitiveness-and-inclusion>

## **Slovenia**

Boesen, R. L., Frydensberg, M. S., & Justi, L. (2022). Digital educational programme invoiving

health professionals (DELIVER): Research report intellectual output 1: Need analysis.

[https://project-deliver.eu/wp-content/uploads/2022/09/DELIVER-report-IO1\\_FINAL.pdf](https://project-deliver.eu/wp-content/uploads/2022/09/DELIVER-report-IO1_FINAL.pdf)

Republika Slovenija Ministrstvo Za Zdravje. (2022). Slovenija – e-zdravje za bolj zdravo

družbo(REFORM/SC2021/061). Republika Slovenija Ministrstvo Za Zdravje.

<https://www.gov.si/assets/ministrstva/MZ/DOKUMENTI/O-MINISTRSTVU/Slovenija-E-zdravje-za-bolj-zdravo-druzbo-v2.pdf>
